# Supplementary material for: Dipolar and catalytic effects of an Fe3O4 based nitrogen-doped hollow carbon sphere framework for high performance lithium sulfur batteries
Source: Royal Society of Chemistry journal article supplement (doi:10.1039/d0qi01393e), 2021-01-01
Supplement: d0qi01393e1.pdf [file d0qi01393e1.pdf]

## Supporting Information

# Dipolar and Catalytic Effect of Fe<sub>3</sub>O<sub>4</sub> Based Nitrogen Doped Hollow Carbon Sphere Framework for High Performance Lithium Sulfur Batteries

*Shungui Deng,<sup>a,b</sup> Qihua Li,<sup>b</sup> Yanhua Chen,<sup>c</sup> Chao Wang,<sup>b</sup> Hongbin Zhao,<sup>a</sup> Jiaqiang Xu,<sup>\*a</sup> Jinghua Wu<sup>\*b,d</sup> and Xiayin Yao<sup>b,d</sup>*

<sup>a</sup>NEST Lab. Department of Chemistry, College of Science, Shanghai University, Shanghai 200444, P. R. China

<sup>b</sup>Ningbo Institute of Materials Technology and Engineering, Chinese Academy of Sciences, Ningbo 315201, Zhejiang, P. R. China

<sup>c</sup>Zhejiang Fashion Institute of Technology, Ningbo 315211, Zhejiang, P. R. China

<sup>d</sup>Center of Materials Science and Optoelectronics Engineering, University of Chinese Academy of Sciences, Beijing 100049, P. R. China

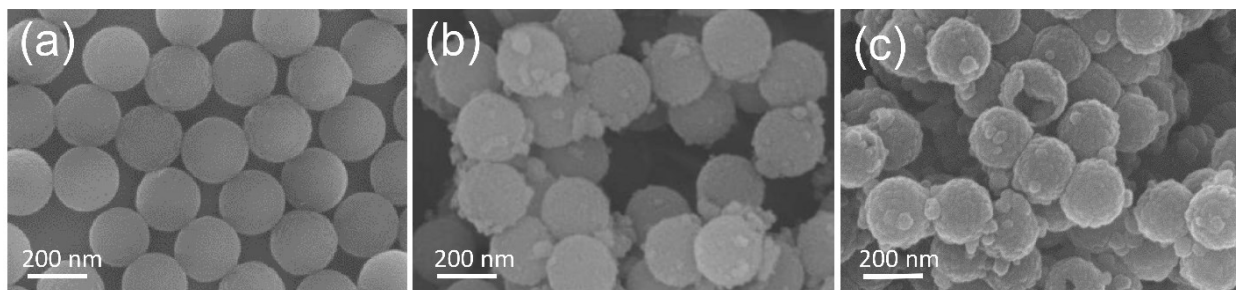

**Fig. S1** SEM image of (a) polystyrene microspheres, (b)  $\text{Fe}^{3+}$ @polydopamine/polystyrene spheres, (c) hollow  $\text{Fe}_3\text{O}_4$ @carbon spheres.

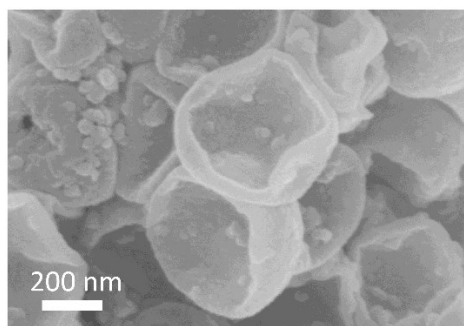

**Fig. S2** The morphology of NC.

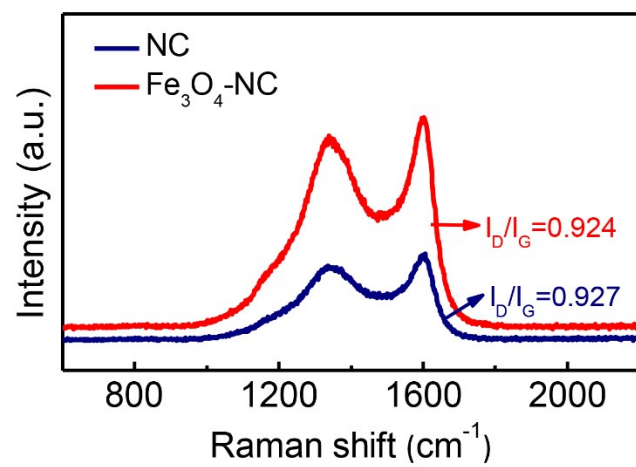

**Fig. S3** Raman spectra of NC and  $\text{Fe}_3\text{O}_4$ -NC.

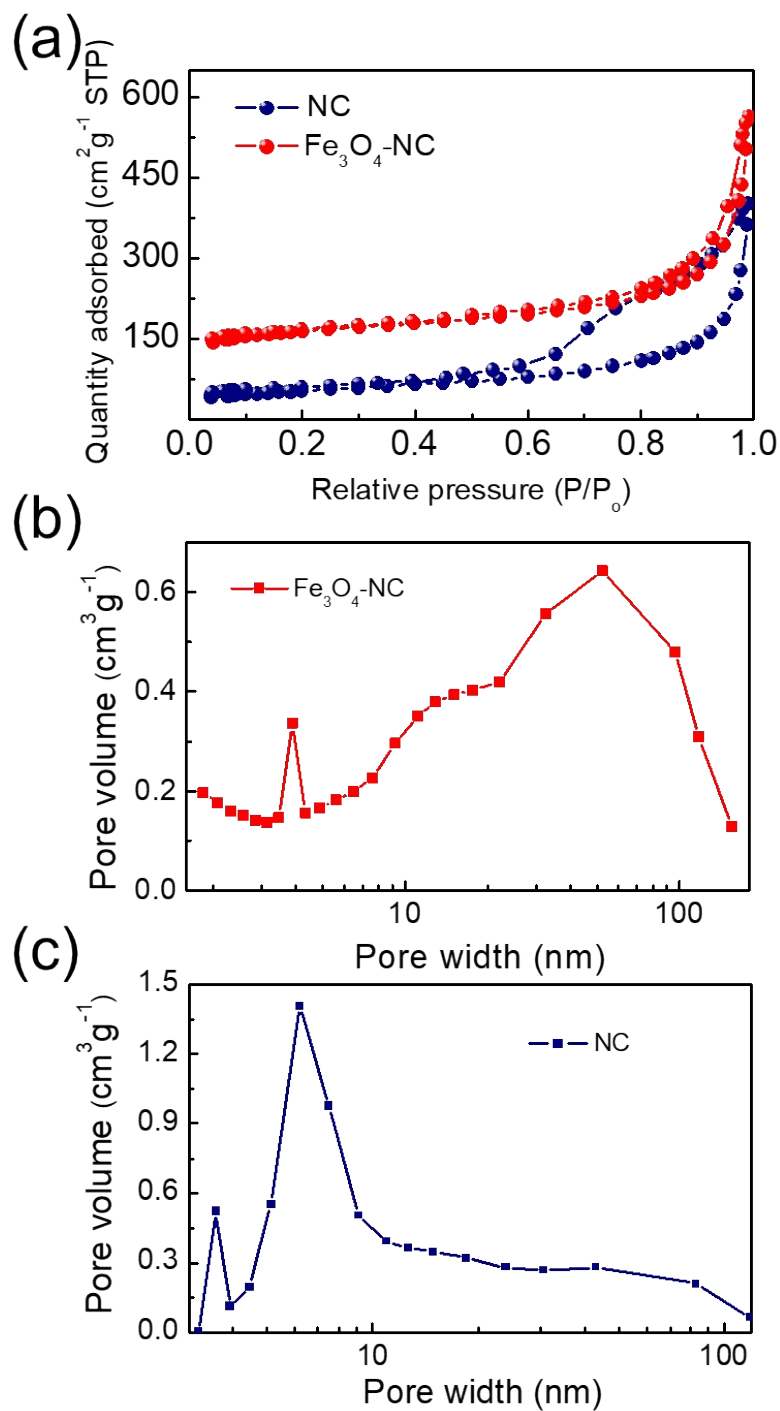

**Fig. S4** (a) N<sub>2</sub> sorption isotherms at 77 K of NC and Fe<sub>3</sub>O<sub>4</sub>-NC. (b, c) BJH model for pore size distribution of Fe<sub>3</sub>O<sub>4</sub>-NC and NC.

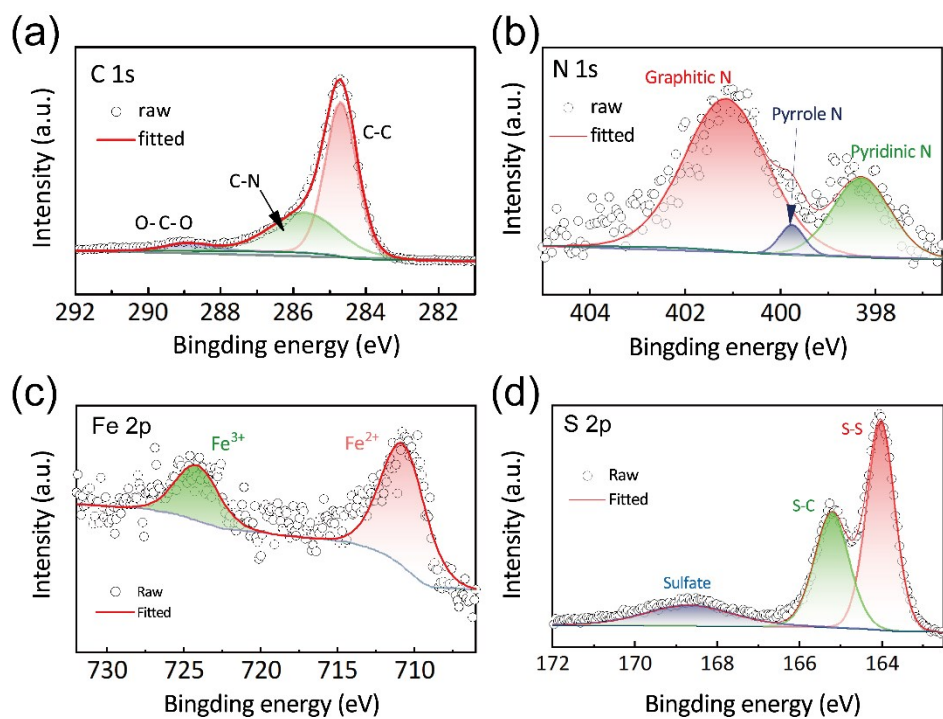

**Fig. S5** High-resolution XPS spectra of (a) C 1s , (b) N 1s, (c) Fe 2p and (d) S 2p.

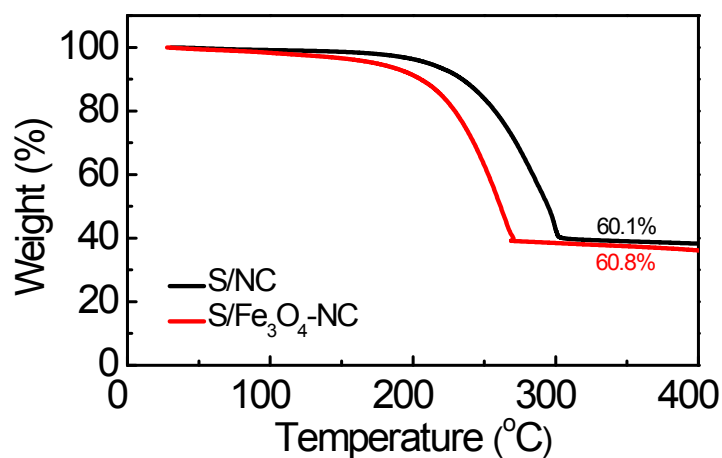

**Fig. S6** TG curves of pure sulfur for S/NC and S/ $\text{Fe}_3\text{O}_4$ -NC with different sulfur contents.

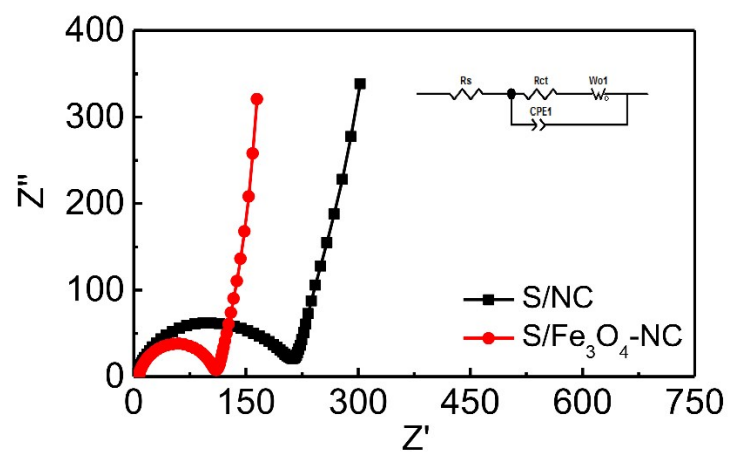

**Fig. S7** EIS plots of S/NC, S/Fe<sub>3</sub>O<sub>4</sub>-NC and the relevant equivalent circuit.

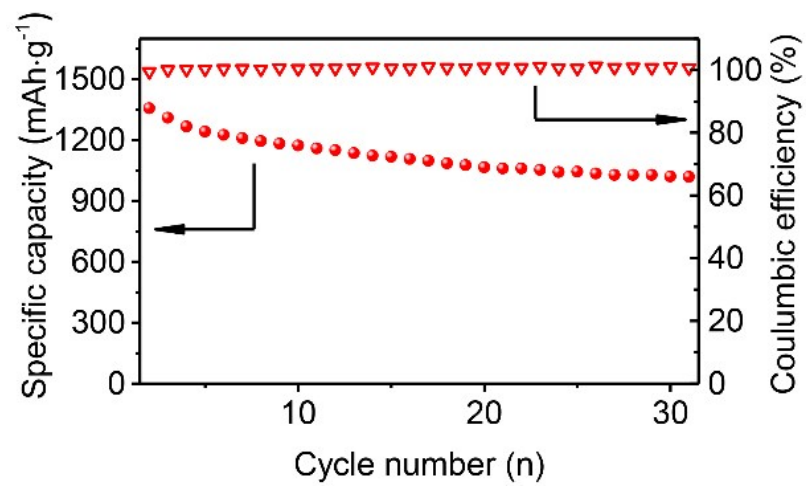

**Fig. S8** Cycling performance of S/Fe<sub>3</sub>O<sub>4</sub>-NC electrode at 0.1 A g<sup>-1</sup>.

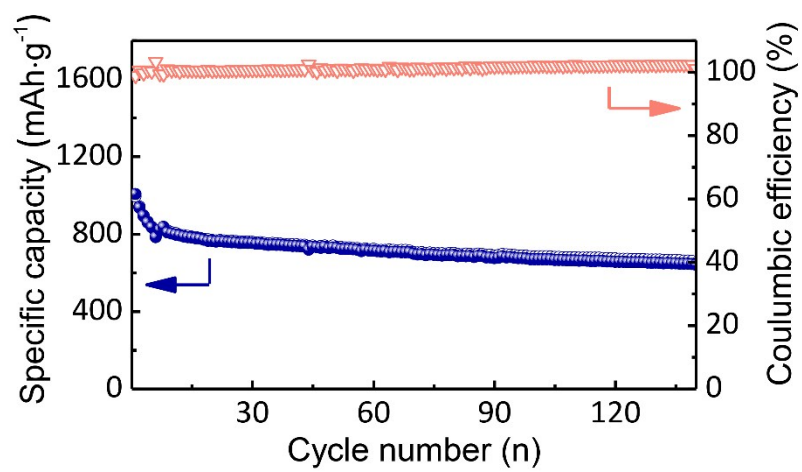

**Fig. S9** Cycling performances of S/Fe<sub>3</sub>O<sub>4</sub>-NC electrode with 2.5 mg cm<sup>-2</sup> sulfur loading at current density of 0.2 A g<sup>-1</sup>.



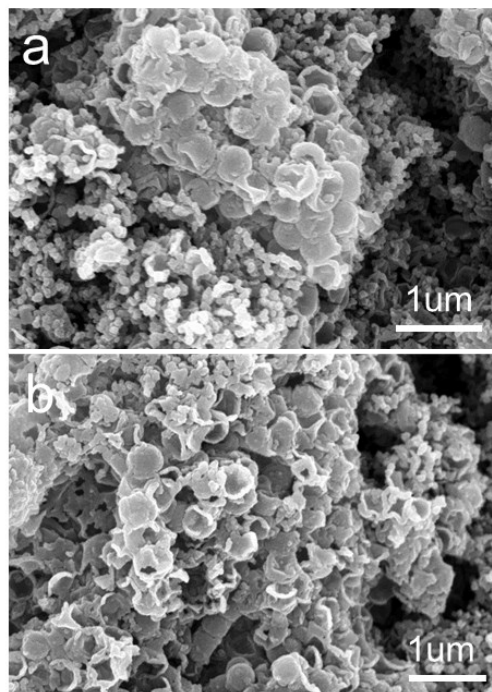

**Fig. S10** SEM of S/Fe<sub>3</sub>O<sub>4</sub>-NC electrode (a) before and (b) after 500 cycling.

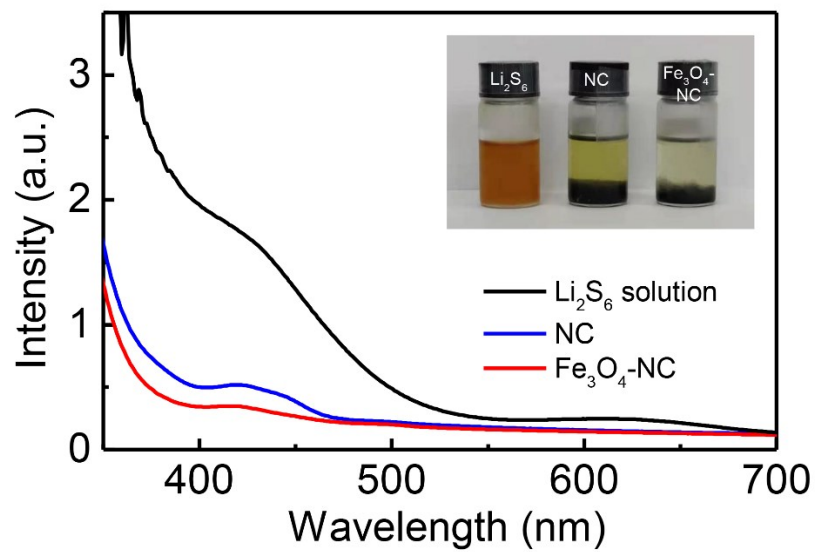

**Fig. S11** UV-Vis spectra and digital photograph of the blank  $\text{Li}_2\text{S}_6$  solution,  $\text{Li}_2\text{S}_6$  solution with NC after 24h and  $\text{Li}_2\text{S}_6$  solution with  $\text{Fe}_3\text{O}_4\text{-NC}$  after 24 h.

**Table S1** BET parameters of NC and Fe<sub>3</sub>O<sub>4</sub>-NC.

| Material                           | BET surface area (m <sup>2</sup> g <sup>-1</sup> ) | Total pore volume (cm <sup>3</sup> g <sup>-1</sup> ) | Average pore diameter (nm) |
|------------------------------------|----------------------------------------------------|------------------------------------------------------|----------------------------|
| NC                                 | 190                                                | 0.61                                                 | 16.42                      |
| Fe <sub>3</sub> O <sub>4</sub> -NC | 559                                                | 0.71                                                 | 14.32                      |

**Table S2** Parameters of the equivalent circuit corresponding to EIS measurement.

| Electrodes                           | R <sub>s</sub> (Ω) | R <sub>ct</sub> (Ω) |
|--------------------------------------|--------------------|---------------------|
| S/NC                                 | 4.616              | 174.5               |
| S/Fe <sub>3</sub> O <sub>4</sub> -NC | 1.843              | 96.9                |

**Table S3** A brief comparison of cycling performance of different carbon host.

| <b>Sulfur host</b>                                                                            | <b>Current density<br/>(sulfur loading)</b>       | <b>Capacity retained<br/>(cycle)</b>                 | <b>Ref.</b> |
|-----------------------------------------------------------------------------------------------|---------------------------------------------------|------------------------------------------------------|-------------|
| Crumpled graphene-encapsulated sulfur <sup>1</sup>                                            | 0.5 C<br>(0.5mg cm <sup>-2</sup> )                | 432mAh g <sup>-1</sup><br>(500 <sup>th</sup> cycle)  | 1           |
| Multifunctional hollow spheres <sup>2</sup>                                                   | 0.2 C<br>(2.25 mg cm <sup>-2</sup> )              | 605 mAh g <sup>-1</sup><br>(300 <sup>th</sup> cycle) | 2           |
| three-dimensional ordered porous carbon bulk networks <sup>3</sup>                            | 1 C<br>(2 mg cm <sup>-2</sup> )                   | 455mAh g <sup>-1</sup><br>(400 <sup>th</sup> cycle)  | 3           |
| Hollow N-doped Carbon Polyhedrons <sup>4</sup>                                                | 1 C<br>(1.0 mg cm <sup>-2</sup> )                 | 404 mAh g <sup>-1</sup><br>(500 <sup>th</sup> cycle) | 4           |
| “Brain-Coral-Like” Mesoporous Hollow CoS <sub>2</sub> @N-Doped Carbon Nanoshells <sup>5</sup> | 1 C<br>(75wt% sulfur content)                     | 519mAh g <sup>-1</sup><br>(300 <sup>th</sup> cycle)  | 5           |
| SnO <sub>2</sub> /C hybrid hollow spheres <sup>6</sup>                                        | 1 C<br>(0.96 mg cm <sup>-2</sup> )                | 478 mAh g <sup>-1</sup><br>(600 <sup>th</sup> cycle) | 6           |
| hollow porous carbon sphere @ MXene composites <sup>7</sup>                                   | 1 C<br>(1.0 mg cm <sup>-2</sup> )                 | 495mAh<br>(500 <sup>th</sup> cycle)                  | 7           |
| Fe <sub>3</sub> O <sub>4</sub> @N-doped hollow carbon spheres                                 | 1 A g <sup>-1</sup><br>(1.5 mg cm <sup>-2</sup> ) | 528mAh g <sup>-1</sup><br>(500 <sup>th</sup> cycle)  | This work   |

## References

1. X. Hu, K. Leng, C. Zhang and J. Luo, Crumpled graphene-encapsulated sulfur for lithium-sulfur batteries, *Rsc Advances*, 2018, **8**, 18502-18507.
2. P. Li, J. Deng, J. Li, M. Zeng, L. Wang and J. Guo, Multifunctional hollow spheres as sulfur hosts for high-performance Li-S batteries, *Journal of Materials Science*, 2020, **55**, 3964-3973.
3. H. Gu, R. Zhang, P. Wang, S. Xie, C. Niu and H. Wang, Construction of three-dimensional ordered porous carbon bulk networks for high performance lithium-sulfur batteries, *Journal of Colloid and Interface Science*, 2019, **533**, 445-451.
4. D.-H. Yang, H.-Y. Zhou, H. Liu and B.-H. Han, Hollow N-doped Carbon Polyhedrons with Hierarchically Porous Shell for Confinement of Polysulfides in Lithium-Sulfur Batteries, *Iscience*, 2019, **13**, 243-253.
5. S.-D. Seo, D. Park, S. Park and D.-W. Kim, "Brain-Coral-Like" Mesoporous Hollow CoS<sub>2</sub>@N-Doped Graphitic Carbon Nanoshells as Efficient Sulfur Reservoirs for Lithium-Sulfur Batteries, *Adv. Funct. Mater.*, 2019, **29**, 1903712.
6. Q. Xiao, K. Wang, X. Wang, S. Huang, N. Cai and N. Li, Solvent-free template synthesis of SnO<sub>2</sub>/C hybrid hollow spheres for superior lithium-sulfur batteries, *Materials Chemistry and Physics*, 2020, **239**, 122070.
7. Q. Qi, H. Zhang, P. Zhang, Z. Bao, W. Zheng, W. Tian, W. Zhang, M. Zhou and Z. Sun, Self-assembled sandwich hollow porous carbon sphere @ MXene composites as superior LiS battery cathode hosts, *2d Materials*, 2020, **7**, 025049.
